# Supplementary material for: Uncovering the hidden players in Lepidoptera biology: the heritable microbial endosymbionts
Source: PeerJ. 2018 May 8;6:e4629. doi: 10.7717/peerj.4629 (PMC5947162; doi:10.7717/peerj.4629)
Supplement: Supplemental Information 1 [file peerj-06-4629-s001.xlsx]

## Sheet: Sheet1
Table S1. Heritable endosymbionts of butterflies
Host family	Host species	Endosymbiont	Wolbachia Supergroup	Source
Hesperiidae	Atrytonopsis hianna	Wolbachia	B	Hamm et al. 2014
Hesperiidae	Atrytonopsis n. sp.1	Wolbachia	B	Hamm et al. 2014
Hesperiidae	Carcharodus alceae	Wolbachia	B	Russell et al. 2012
Hesperiidae	Carterocephalus palaemon	Wolbachia	B	Russell et al. 2012
Hesperiidae	Carterocephalus silvicola	Wolbachia	B	Ilinsky and Kosterin 2017
Hesperiidae	Erynnis tages	Wolbachia	B	Russell et al. 2012
Hesperiidae	Euphyes dukesi	Wolbachia	B	Hamm et al. 2014
Hesperiidae	Hesperia ottoe	Wolbachia	B	Hamm et al. 2014
Hesperiidae	Heteropterus morpheus	Wolbachia	B	Ilinsky and Kosterin 2017
Hesperiidae	Hylephila phlaeas	Wolbachia	undefined	Weeks et al. 2003
Hesperiidae	Leptalina unicolor	Wolbachia	B	Tagami and Miura 2004
Hesperiidae	Ochlodes venata	Wolbachia	B	Russell et al. 2012
Hesperiidae	Ochlodes sylvanus	Wolbachia	B	Ilinsky and Kosterin 2017
Hesperiidae	Polites mardon	Wolbachia	B	Hamm et al. 2014
Hesperiidae	Polites sabuleti albomontana	Wolbachia	B	Hamm et al. 2014
Hesperiidae	Polytremis fukia	Wolbachia	A	Jiang et al. 2016
Hesperiidae	Polytremis nascens	Wolbachia	A	Jiang et al. 2014
Hesperiidae	Polytremis pellucid	Wolbachia	A	Jiang et al. 2014
Hesperiidae	Polytremis theca	Wolbachia	A	Jiang et al. 2014
Hesperiidae	Pyrgus malvae	Wolbachia	B	Ilinsky and Kosterin 2017
Hesperiidae	Pyrgus ruralis lagunae	Wolbachia	B	Hamm et al. 2014
Hesperiidae	Spialia orbifer	Wolbachia	A, B	Hernández-Roldán et al. 2016
Hesperiidae	Spiala rosea	Wolbachia	A, F	Hernández-Roldán et al. 2016
Hesperiidae	Spialia therapne	Wolbachia	F	Hernández-Roldán et al. 2016
Hesperiidae	Suniana sunias	Wolbachia	B	Russell et al. 2012
Hesperiidae	Taractrocera ceramus	Wolbachia	B	Salunke et al. 2012
Hesperiidae	Thymelicus sylvestris	Wolbachia	B	Duron et al. 2008
Hesperiidae	Trapezites eliena	Spiroplasma sp.	NA	Russell et al. 2012
Hesperiidae	Udaspes folus	Wolbachia	B	Salunke et al. 2012
Hesperiidae	Urbanus belli (ehakernae)	Wolbachia	B	Bertrand et al. 2014
Hesperiidae	Urbanus belli (segnestami)	Wolbachia	B	Bertrand et al. 2014
Hesperiidae	Urbanus sp.	Wolbachia	undefined	Russell et al. 2012
Hesperiidae	Vettius pica	Wolbachia	A	Russell et al. 2012
Lycaenidae	Anthene emolus	Wolbachia	B	Russell et al. 2009
Lycaenidae	Aricia artaxerxes	Wolbachia	A	Ilinsky and Kosterin 2017
Lycaenidae	Azanus mirza	Wolbachia	B	Russell et al. 2009
Lycaenidae	Brangas felderi	Wolbachia	B	Russell et al. 2009
Lycaenidae	Caleta caleta	Wolbachia	B	Salunke et al. 2012
Lycaenidae	Callophrys (Incisalia) irus	Wolbachia	B	Hamm et al. 2014
Lycaenidae	Castalius rosimon	Wolbachia	B	Salunke et al. 2012
Lycaenidae	Celastrina argiolus	Wolbachia	B	Russell et al. 2009
Lycaenidae	Cigaritis syama	Wolbachia	undefined	Russell et al. 2009
Lycaenidae	Cupido minimus	Wolbachia	B	Ilinsky and Kosterin 2017
Lycaenidae	Eumedonia eumedon	Wolbachia	B	Ilinsky and Kosterin 2017
Lycaenidae	Euphilotes pallescens arenamontana	Wolbachia	B	Hamm et al. 2014
Lycaenidae	Everes alcetas	Wolbachia	B	Ilinsky and Kosterin 2017
Lycaenidae	Everes argiades	Wolbachia	B	Tagami and Miura 2004
Lycaenidae	Famegana alsulus	Wolbachia	undefined	Russell et al. 2009
Lycaenidae	Glaucopsyche lycormas	Wolbachia	B	Ilinsky and Kosterin 2017
Lycaenidae	Heodes virgaureae	Wolbachia	B	Ilinsky and Kosterin 2017
Lycaenidae	Horaga onyx	Wolbachia	B	Russell et al. 2009
Lycaenidae	Hypaurotis crysalus	Wolbachia	undefined	Russell et al. 2009
Lycaenidae	Iraota rochana	Wolbachia	A	Russell et al. 2009
Lycaenidae	Jalmerus evagoras	Wolbachia	B	Salunke et al. 2012
Lycaenidae	Jamides alecto	Wolbachia	A	Russell et al. 2009
Lycaenidae	Japonica lutea	Wolbachia	undefined	Yun et al. 2014
Lycaenidae	Lampides boeticus	Wolbachia	undefined	Lohman et al. 2008
Lycaenidae	Lepidochrysops ansorgei	Wolbachia	A	Russell et al. 2012
Lycaenidae	Lepidochrysops erici	Wolbachia	A	Russell et al. 2012
Lycaenidae	Lepidochrysops michaeli	Wolbachia	A	Russell et al. 2012
Lycaenidae	Lepidochrysops skotios	Wolbachia	A	Russell et al. 2012
Lycaenidae	Lepidochrysops dukei	Wolbachia	A	Russell et al. 2012
Lycaenidae	Lepidochrysops jamesi	Wolbachia	A	Russell et al. 2012
Lycaenidae	Lepidochrysops pampolis	Wolbachia	A	Russell et al. 2012
Lycaenidae	Lepidochrysops robertsoni	Wolbachia	A	Russell et al. 2012
Lycaenidae	Lepidochrysops variabilis	Wolbachia	A	Russell et al. 2012
Lycaenidae	Liphyra brassolis	Wolbachia	B	Russell et al. 2009
Lycaenidae	Lycaeides idas	Wolbachia	B	Russell et al. 2009
Lycaenidae	Lycaeides melissa melissa	Wolbachia	undefined	Nice et al. 2009
Lycaenidae	Lycaeides melissa samuelis	Wolbachia	undefined	Nice et al. 2009
Lycaenidae	Lycaena dispar	Wolbachia	undefined	Yun et al. 2014
Lycaenidae	Lycaena phlaeas daimio	Wolbachia	B	Tagami and Miura 2004
Lycaenidae	Lycaena thersamon	Wolbachia	B	Russell et al. 2009
Lycaenidae	Madeleinea sigal	Wolbachia	A	Russell et al. 2009
Lycaenidae	Maculinea alcon	Wolbachia	B	Sielezniew et al. 2012, Bereczki et al. 2015
Lycaenidae	Maculinea (Phengaris) arion	Wolbachia	A	Patricelli et al. 2013, Bereczki et al. 2015
Lycaenidae	Maculinea nausithous	Wolbachia	A, B	Ritter et al. 2013, Bereczki et al. 2015
Lycaenidae	Maculinea teleius	Wolbachia	A, B	Ritter et al. 2013, Bereczki et al. 2015
Lycaenidae	Nacaduba angusta	Wolbachia	B	Russell et al. 2009
Lycaenidae	Ornipholidotos peucetia	Wolbachia	A	Russell et al. 2009
Lycaenidae	Plebejus sp.	Wolbachia	B	Werren & Windsor 2000
Lycaenidae	Plebejus argus	Wolbachia	B	Ilinsky and Kosterin 2017
Lycaenidae	Plebejus (Lycaeides) idas nabokovi	Wolbachia	B	Hamm et al. 2014
Lycaenidae	Plebejus saepiolus	Wolbachia	B	Hamm et al. 2014
Lycaenidae	Polyommatus amandus	Wolbachia	B	Ilinsky and Kosterin 2017
Lycaenidae	Polyommatus damon	Wolbachia	B	Ilinsky and Kosterin 2017
Lycaenidae	Polyommatus eros	Wolbachia	B	Ilinsky and Kosterin 2017
Lycaenidae	Polyommatus icarus	Wolbachia	B	Ilinsky and Kosterin 2017
Lycaenidae	Poritia sumatrae	Spiroplasma sp.	NA	Russell et al. 2012
Lycaenidae	Pseudozizeeria maha	Wolbachia	B	Salunke et al. 2012
Lycaenidae	Satyrium w-album	Wolbachia	B	Ilinsky and Kosterin 2017
Lycaenidae	Satyrium pruni	Wolbachia	A	Ilinsky and Kosterin 2017
Lycaenidae	Spalgis epius	Wolbachia	B	Russell et al. 2009
Lycaenidae	Surendra vivarna	Wolbachia	B	Russell et al. 2009
Lycaenidae	Talicada nyseus	Wolbachia	B	Ankola et al. 2011, Salunke et al. 2012
Lycaenidae	Tarucus nara	Wolbachia	B	Salunke et al. 2012
Lycaenidae	Thecla betulae	Wolbachia	B	Ilinsky and Kosterin 2017
Lycaenidae	Thersamonia thersamon	Wolbachia	B	Russell et al. 2009
Lycaenidae	Tongeia fischeri	Wolbachia	B	Choi et al. 2015
Lycaenidae	Ussuriana stygiana	Wolbachia	B	Tagami and Miura 2004
Lycaenidae	Zizeeria knysna	Wolbachia	B	Salunke et al. 2012
Lycaenidae	Zizeeria maha argia	Wolbachia	B	Tagami and Miura 2004
Lycaenidae	Zizina emelina	Wolbachia	A, B	Sakamoto et al. 2011
Lycaenidae	Zizina labradus	Wolbachia	undefined	Gillespie et al. 2013
Lycaenidae	Zizina oxleyi	Wolbachia	undefined	Gillespie et al. 2013
Nymphalidae	Acraea acerata	Wolbachia	undefined	Jiggins et al. 2001
Nymphalidae	Acraea alcinoe	Wolbachia	undefined	Jiggins et al. 2001
Nymphalidae	Acraea althoffi	Wolbachia	undefined	Jiggins et al. 2001
Nymphalidae	Acraea encedana	Wolbachia	B	Jiggins et al. 2000a
Nymphalidae	Acraea encedon	Wolbachia	B	Jiggins et al. 1998
Nymphalidae	Acraea eponina	Wolbachia	B	Jiggins et al. 2001, Russell et al. 2009
Nymphalidae	Acraea equitorialis	Wolbachia	B	Jiggins et al. 2001b
Nymphalidae	Acraea macarista	Wolbachia	undefined	Jiggins et al. 2001
Nymphalidae	Acraea peneleos	Wolbachia	undefined	Jiggins et al. 2001
Nymphalidae	Acraea pharsallus	Wolbachia	undefined	Jiggins et al. 2001
Nymphalidae	Acraea stoikensis	Wolbachia	undefined	Hassan and Idris 2013
Nymphalidae	Aphantopus hyperantus	Wolbachia	A	Ilinsky and Kosterin 2017
Nymphalidae	Araschnia levana	Wolbachia	A	Ilinsky and Kosterin 2017
Nymphalidae	Argynnis paphia	Wolbachia	B	Russell et al. 2012
Nymphalidae	Ariadne merione	Wolbachia	B	Salunke et al. 2012
Nymphalidae	Bicyclus anisops	Wolbachia	B	Duplouy & Brattström 2017
Nymphalidae	Bicyclus auricruda fulgida	Wolbachia	A	Duplouy & Brattström 2017
Nymphalidae	Bicyclus collinsi	Wolbachia	A	Duplouy & Brattström 2017
Nymphalidae	Bicyclus dentata	Wolbachia	B	Duplouy & Brattström 2017
Nymphalidae	Bicyclus ephorus	Wolbachia	B	Duplouy & Brattström 2017
Nymphalidae	Bicyclus evadne	Wolbachia	A, B	Duplouy & Brattström 2017
Nymphalidae	Bicyclus funebris	Wolbachia	B	Duplouy & Brattström 2017
Nymphalidae	Bicyclus ignobilis	Wolbachia	A	Duplouy & Brattström 2017
Nymphalidae	Bicyclus italus	Wolbachia	B	Duplouy & Brattström 2017
Nymphalidae	Bicyclus jacksoni	Wolbachia	B	Duplouy & Brattström 2017
Nymphalidae	Bicyclus mandanes	Wolbachia	A	Duplouy & Brattström 2017
Nymphalidae	Bicyclus nobilis	Wolbachia	B	Duplouy & Brattström 2017
Nymphalidae	Bicyclus pavonis	Wolbachia	B	Duplouy & Brattström 2017
Nymphalidae	Bicyclus sanaos	Wolbachia	undefined	Duplouy & Brattström 2017
Nymphalidae	Bicyclus sangmelinae	Wolbachia	B	Duplouy & Brattström 2017
Nymphalidae	Bicyclus sylvicolus	Wolbachia	B	Duplouy & Brattström 2017
Nymphalidae	Bicyclus taenias	Wolbachia	B	Duplouy & Brattström 2017
Nymphalidae	Bicyclus vulgaris	Wolbachia	A	Duplouy & Brattström 2017
Nymphalidae	Bicyclus xeneas	Wolbachia	A	Duplouy & Brattström 2017
Nymphalidae	Bicyclus xeneas xeneas	Wolbachia	B	Duplouy & Brattström 2017
Nymphalidae	Caligo telamonius	Wolbachia	undefined	Shokralla et al. 2014
Nymphalidae	Carystus phorcus	Wolbachia	undefined	Shokralla et al. 2014
Nymphalidae	Charaxes bernardus	Wolbachia	B	Russell et al. 2012
Nymphalidae	Cissia lybie	Wolbachia	B	Werren et al. 1995
Nymphalidae	Cissia usitata	Wolbachia	A, B	Werren et al. 1995
Nymphalidae	Clossiana oscarus	Wolbachia	B	Ilinsky and Kosterin 2017
Nymphalidae	Coenonympha glycerion	Wolbachia	B	Ilinsky and Kosterin 2017
Nymphalidae	Coenonympha hero	Wolbachia	B	Ilinsky and Kosterin 2017
Nymphalidae	Coenonympha oedippus	Wolbachia	B	Ilinsky and Kosterin 2017
Nymphalidae	Coenonympha pamphilus	Wolbachia	B	Ilinsky and Kosterin 2017
Nymphalidae	Coenonympha tullia	Wolbachia	B	Russell et al. 2012
Nymphalidae	Danaus chrysippus	Spiroplasma ixodeti, Wolbachia	NA, B	Jiggins et al. 2000b, Salunke et al. 2012
Nymphalidae	Danaus plexippus	Ophryocystis elektroscirrha	NA	McLaughlin and Myers 1970, Altizer and Oberhauser 1999
Nymphalidae	Erebia aethiops	Wolbachia	A, B	Ilinsky and Kosterin 2017
Nymphalidae	Erebia jeniseiensis	Wolbachia	A, B	Ilinsky and Kosterin 2017
Nymphalidae	Erebie ligea	Wolbachia	B	Ilinsky and Kosterin 2017
Nymphalidae	Euphydryas aurinia	Wolbachia	B	Russell et al. 2012
Nymphalidae	Euptoieta clandia	Wolbachia	B	Russell et al. 2012
Nymphalidae	Fabriciana adippe	Wolbachia	B	Ilinsky and Kosterin 2017
Nymphalidae	Heliconius erato chestertonii	Wolbachia	A, B	Munoz et al. 2011
Nymphalidae	Heteropsis exocellata	Wolbachia	A	Linares et al. 2009
Nymphalidae	Heteropsis pauper	Wolbachia	A	Linares et al. 2009
Nymphalidae	Heteropsis subsimilis	Wolbachia	A, B	Linares et al. 2009
Nymphalidae	Hipparchia autonoe	Wolbachia	B	Ilinsky and Kosterin 2017
Nymphalidae	Hypolimnas bolina	Wolbachia	A, B	Dyson et al. 2002, Charlat et al. 2005
Nymphalidae	Hyponephele lycaon	Wolbachia	B	Ilinsky and Kosterin 2017
Nymphalidae	Ideopsis similis similis	Wolbachia	B	Tagami and Miura 2004
Nymphalidae	Ithomia iphianassa	Wolbachia	B	Russell et al. 2012
Nymphalidae	Junonia almana almana	Wolbachia	B	Tagami and Miura 2004
Nymphalidae	Junonia (Precis) iphita	Wolbachia	B	Salunke et al. 2012
Nymphalidae	Junonia lemonias	Wolbachia	B	Salunke et al. 2012
Nymphalidae	Junonia orithya	Wolbachia	B	Tagami and Miura 2004
Nymphalidae	Lasiommata petropolitana	Wolbachia	B	Ilinsky and Kosterin 2017
Nymphalidae	Libythea celtis	Wolbachia	B	Tagami and Miura 2004
Nymphalidae	Libythea myrrha	Wolbachia	B	Russell et al. 2009
Nymphalidae	Limenitis populi	Wolbachia	B	Ilinsky and Kosterin 2017
Nymphalidae	Lopinga achine	Wolbachia	B	Ilinsky and Kosterin 2017
Nymphalidae	Maniola jurtina	Wolbachia	B	Cordeaux et al. 2008
Nymphalidae	Melanargia galathea	Wolbachia	B	Russell et al. 2012
Nymphalidae	Melanargia russiae	Wolbachia	B	Ilinsky and Kosterin 2017
Nymphalidae	Melanitis leda	Wolbachia	B	Russell et al. 2012; Salunke et al. 2012
Nymphalidae	Melitaea athalia	Wolbachia	B	Ilinsky and Kosterin 2017
Nymphalidae	Melitaea britomartis	Wolbachia	A	Ilinsky and Kosterin 2017
Nymphalidae	Melitaea didyma	Wolbachia	B	Russell et al. 2012
Nymphalidae	Melitaea phoebe	Wolbachia	B	Tóth et al. 2017
Nymphalidae	Melitaea ornata	Wolbachia	B	Tóth et al. 2017
Nymphalidae	Minois dryas	Wolbachia	B	Ilinsky and Kosterin 2017
Nymphalidae	Mycalesis francisca	Wolbachia	A	Tagami and Miura 2004
Nymphalidae	Neptis hylas	Wolbachia	B	Salunke et al. 2012
Nymphalidae	Neptis rivularis	Wolbachia	B	Ilinsky and Kosterin 2017
Nymphalidae	Neptis sappho	Wolbachia	undefined	Ilinsky and Kosterin 2017
Nymphalidae	Neptis speyeria	Wolbachia	undefined	Yun et al. 2014
Nymphalidae	Neonympha mitchellii francisi	Wolbachia	B	Hamm et al. 2014
Nymphalidae	Neonympha mitchellii mitchellii	Wolbachia	B	Hamm et al. 2014
Nymphalidae	Nymphalis antiopa	Wolbachia	A	Ilinsky and Kosterin 2017
Nymphalidae	Nymphalis xanthomelas	Wolbachia	A	Tagami and Miura 2004
Nymphalidae	Opsiphanes tamarindi	Wolbachia	undefined	Shokralla et al. 2014
Nymphalidae	Parantica aglae	Wolbachia	B	Salunke et al. 2012
Nymphalidae	Pararge aegeria	Wolbachia	B	Russell et al. 2012
Nymphalidae	Polygonia c-album	Wolbachia	B	Kodandaramaiah et al. 2011
Nymphalidae	Polygonia c-aureum	Wolbachia	B	Tagami and Miura 2004
Nymphalidae	Polygonia faunus	Wolbachia	undefined	Kodandaramaiah et al. 2012
Nymphalidae	Pronophila thelebe	Wolbachia	B	Russell et al. 2012
Nymphalidae	Ragadia makuta	Wolbachia	A	Russell et al. 2012
Nymphalidae	Speyeria diana	Wolbachia	B	Hamm et al. 2014
Nymphalidae	Speyeria idalia	Wolbachia	B	Hamm et al. 2014
Nymphalidae	Speyeria zerene gunderi	Wolbachia	undefined	McHugh et al. 2013
Nymphalidae	Speyeria zerene picta	Wolbachia	undefined	McHugh et al. 2013
Nymphalidae	Tirumala limniace	Wolbachia	B	Salunke et al. 2012
Nymphalidae	Ypthima argus	Wolbachia	B	Tagami and Miura 2004
Nymphalidae	Ypthima asterope	Wolbachia	B	Salunke et al. 2012
Papilionidae	Battus belus	Wolbachia	A	Russell et al. 2012
Papilionidae	Iphiclides podalirius	Wolbachia	B	Russell et al. 2012
Papilionidae	Meandrusa payeni	Wolbachia	A	Russell et al. 2012
Papilionidae	Papilio demoleus	Wolbachia	B	Salunke et al. 2012
Papilionidae	Papilio machaon	Wolbachia	A	Ilinsky and Kosterin 2017
Papilionidae	Papilio macilentus	Wolbachia	undefined	Yun et al. 2014
Papilionidae	Papilio polymnestor	Wolbachia	B	Ankola et al. 2011
Papilionidae	Papilio troilus ilioneus	Wolbachia	undefined	Jeyaprakash and Hoy 2000
Papilionidae	Parnassius apollo	Wolbachia	undefined	Łukasiewicz et al. 2015
Papilionidae	Parnassius stubbendorffii	Wolbachia	B	Ilinsky and Kosterin 2017
Papilionidae	Sericinius montela	Wolbachia	undefined	Yun et al. 2014
Pieridae	Catopsilia crocale	Wolbachia	undefined	Pattabhiramaiah et al. 2012
Pieridae	Catopsilia pomona	Wolbachia	B	Salunke et al. 2012
Pieridae	Catopsilia pyranthe	Wolbachia	undefined	Pattabhiramaiah et al. 2012
Pieridae	Cepora nerissa	Wolbachia	B	Salunke et al. 2012
Pieridae	Colias erate poliographus	Wolbachia	B	Tagami and Miura 2004, Narita et al. 2009
Pieridae	Colias eurytheme	Wolbachia	undefined	Pattabhiramaiah et al. 2012
Pieridae	Colias hyale	Wolbachia	undefined	Ilinsky and Kosterin 2017
Pieridae	Colias palaeno	Wolbachia	A	Ilinsky and Kosterin 2017
Pieridae	Colotis amata	Wolbachia	B	Salunke et al. 2012
Pieridae	Delias eucharis	Wolbachia	B	Salunke et al. 2012
Pieridae	Eurema hecabe	Wolbachia	B	Hiroki et al. 2002, Hiroki et al. 2004
Pieridae	Eurema mandarina	Wolbachia	B	Narita et al 2011
Pieridae	Eurema laeta	Wolbachia	B	Salunke et al. 2012; Choi et al 2015
Pieridae	Ixias pyrene	Wolbachia	B	Salunke et al. 2012
Pieridae	Leptidea amurensis	Wolbachia	B	Solovyev et al. 2015
Pieridae	Leptidea jurvenica	Wolbachia	B	Solovyev et al. 2015
Pieridae	Leptidea mosei	Wolbachia	B	Solovyev et al. 2015
Pieridae	Leptidea sinapis	Wolbachia	B	Russell et al. 2012
Pieridae	Leptosia nina	Wolbachia	B	Salunke et al. 2012
Pieridae	Mylothris agathina	Wolbachia	undefined	Russell et al. 2012
Pieridae	Nathalis iole	Wolbachia	B	Russell et al. 2012
Pieridae	Pareronia valeria	Wolbachia	B	Salunke et al. 2012
Pieridae	Pereute charops	Wolbachia	A	Russell et al. 2012
Pieridae	Pieris brassicae	Wolbachia	undefined	Ilinsky and Kosterin 2017
Pieridae	Pieris canidia	Wolbachia	undefined	Yun et al. 2014
Pieridae	Pieris napi	Wolbachia	undefined	Ilinsky and Kosterin 2017
Pieridae	Pieris rapae	Wolbachia	B	Tagami and Miura 2004
Pieridae	Pontia daplidice	Wolbachia	B	Ilinsky and Kosterin 2017
Riodinidae	Mesene phareus	Spiroplasma sp.	NA	Russell et al. 2012
Riodinidae	Rhetus nr periander	Spiroplasma sp.	NA	Russell et al. 2012
Riodinidae	Saribia tepahi	Wolbachia	A	Linares et al. 2009
Abreviations: NA - not applicable
