# Supplementary material for: Uncovering the hidden players in Lepidoptera biology: the heritable microbial endosymbionts
Source: PeerJ. 2018 May 8;6:e4629. doi: 10.7717/peerj.4629 (PMC5947162; doi:10.7717/peerj.4629)
Supplement: Supplemental Information 3 [file peerj-06-4629-s003.xlsx]

## Sheet: Sheet1
References for Tables S1 & S2
Altizer, S.M. & Oberhauser, K.S. 1999. Effects of the Protozoan Parasite Ophryocystis elektroscirrhaon the Fitness of Monarch Butterflies (Danaus plexippus). J. Invertebr. Pathol. 74: 76–88.
Ankola, K., Brueckner, D. & Puttaraju, H.P. 2011. Wolbachia endosymbiont infection in two Indian butterflie and female-biased se ratio in the Red Pierrot, Talicada nyseus. J. Biosci. 36: 845-850.
Avtzis, D.N., Doudoumis, V. & Bourtzis, K. 2014. Wolbachia infections and mitochondrial diversity of two Chestnut feeding Cydia species. PLoS One. 9: e112795.
Behera, L., Sahu, S.C., Rajamani, S. & Mohan, M. 2001. Molecular evidence for Wolbachia in rice insects. Curr. Sci. 81: 1299-1300.
Bereczki, J., Rácz, R., Varga, Z. & Tóth, J. P. (2015) Controversial patterns of Wolbachia infestation in the social parasitic Maculinea butterflies (Lepidoptera: Lycaenidae). Org Divers Evol 15, 591–607
Bertrand, C., Janzen, D.H., Hallwachs, W., Burns, J.M., Gibson, J.F., Shokralla, S. & Hajibabaei, M. 2014. Mitochondrial and nuclear phylogenetic analysis with Sanger and next-generation sequencing shows that, in Área de Conservación Guanacaste, northwestern Costa Rica, the skipper butterfly named Urbanus belli (family Hesperiidae) comprises three morphologically cryptic species. BMC Evol. Biol. …
Brower, J.H. 1976. Cytoplasmic incompatibility: occurrence in a stored-product pest Ephestia cautella. A. Entomol. Soc. Am. 69: 1011-1015.
Chai, H-N. & Du, Y-Z. 2011. Detection and phylogenetic analysis of Wolbachia wsp in the Chilo suppressalis (Lepidoptera: Crambidae) in China. Ann. Entomol. Soc. Am. 104: 998-1004.
Chai, H-N., Wu H-Y & Du, Y-Z. 2013. Detection and analysis of symbiotic bacteria, Arsenophonus and Wolbachia, in striped stem borer, Chilo suppressalis (Lepidoptera: Crambidae) Ying Yong Sheng Tai Xue Bao 24:12 3517-3522
Charlat, S., Hornett, E.A., Dyson, E.A., Ho, P.P.Y., Loc, N.T., Schilthuizen, M., et al. 2005. Prevalence and penetrance variation of male-killing Wolbachia across Indo-Pacific populations of the butterfly Hypolimnas bolina. Mol. Ecol. 14: 3525–3530.
Chen. F., Coates, B., He. K-L., Bai. S-X., Zhang. T-T. & Wang. Z-Y. 2016 Effects of Wolbachia on mitochondrial DNA variation in populations of Athetis lepigone (Lepidoptera: Noctuidae) in China. Mitochondrial DNA Part A Vol. 28 , Iss. 6,2017
Choi. S., Shin. S-K., Jeong. G. & Yi. H. 2015 WolbachiaSequence Typing in Butterflies Using Pyrosequencing. J. Microbiol. Biotechnol. 25(9), 1410–1416
Cordaux R, Pichon S, Ling A, Perez P, Delaunay C, Vavre F, Bouchon D, Greve P (2008) Intense transpositional activity of insertion sequences in an ancient obligate endosymbiont Mol. Biol. Evol. 25:1889–1896
Delgado, A.M. & Cook, J.M. 2009. Effects of a sex-ratio distorting endosymbiont on mtDNA variation in a global insect pest. BMC Evol Biol 9: 49–49.
Derks, M. F. L., Smit, S., Salis, L., Schijlen, E., Bossers, A., Mateman, C., … Megens, H.-J. (2015). The Genome of Winter Moth (Operophtera brumata) Provides a Genomic Perspective on Sexual Dimorphism and Phenology. Genome Biology and Evolution, 7(8), 2321–2332.
Duplouy, A. & Brattström, O. (2017) Wolbachia in the Genus Bicyclus: a Forgotten Player. Microbial Ecology 1–9 doi:10.1007/s00248-017-1024-9
Duron, O., Bouchon, D., Boutin, S., Bellamy, L., Zhou, L., Engelstädter, J., et al. 2008. The diversity of reproductive parasites among arthropods: Wolbachia do not walk alone. BMC Biol 6: 27–27.
Dyson, E.A., Kamath, M.K. & Hurst, G. 2002. Wolbachia infection associated with all-female broods in Hypolimnas bolina (Lepidoptera: Nymphalidae): evidence for horizontal transmission of a butterfly male killer. Heredity 88: 166–171.
Fujii, Y., Kageyama, D., Hoshizaki, S., Ishikawa, H. & Sasaki, T. 2001. Transfection of Wolbachia in Lepidoptera: the feminizer of the adzuki bean borer Ostrinia scapulalis causes male killing in the Mediterranean flour moth Ephestia kuehniella. Proc. R. Soc. Lond. B. Biol. Sci. 268: 855–859.
Gillespie, M., Wratten, S.D., Cruickshank, R., Wiseman, B.H. & Gibbs, G.W. 2013. Incongruence between morphological and molecular markers in the butterfly genus Zizina (Lepidoptera: Lycaenidae) in New Zealand. Syst. Entomol. 38: 151-163.
Graham, R.I., Hartley, L. & Wilson, K. 2011. Characterisation of a nucleopolyhedrovirus and Spiroplasma sp. bacterium associated with outbreaking populations of the Antler moth Cerapteryx graminis. J. Invertebr. Pathol. 107: 90-93.
Gutzwiller, F., Dedeine, F., Kaiser, W., Giron, D. & López-Vaamonde, C. (2015) Correlation between the green-island phenotype and Wolbachiainfections during the evolutionary diversification of Gracillariidae leaf-mining moths. Ecol Evol 5, 4049–4062
Graham, R. I. & Wilson, K. (2012) Male-killing Wolbachia and mitochondrial selective sweep in a migratory African insect. BMC Evol. Biol. 12, 204–11
Hamm, C.A., Handley, C.A., Pike, A., Forister, M.L., Fordyce, J.A. & Nice, C.C. 2014. Wolbachia infection and Lepidoptera of conservation concern. J. Insect Sci. 14: 6.
Hassan, S.S.M. & Idris, E. 2013. Male-killing in African butterflies. Trends Evol. Biol. 5: 7-14.
Hernández-Roldán, J. L., Dapporto, L., Dincă, V., Vicente, J. C., Hornett, E. A., Šíchová, J., Lukhtanov, V. A., Talavera, G. and Vila, R. (2016), Integrative analyses unveil speciation linked to host plant shift in Spialia butterflies. Mol Ecol, 25: 4267–4284. doi:10.1111/mec.13756
Hiroki, M., Kato, Y., Kamito, T. & Miura, K. 2002. Feminization of genetic males by a symbiotic bacterium in a butterfly, Eurema hecabe (Lepidoptera: Pieridae). Naturwissenschaften 89: 167–170.
Hiroki, M., Tagami, Y., Miura, K. & Kato, Y. 2004. Multiple infection with Wolbachia inducing different reproductive manipulations in the butterfly Eurema hecabe. Proc. R. Soc. Lond. B. Biol. Sci 271: 1751–1755.
Ilinsky, Y. & Kosterin, O. E. Molecular diversity of Wolbachia in Lepidoptera: Prevalent allelic content and high recombination of MLST genes. Molecular Phylogenetics and Evolution 109, 164–179 (2017).
Jeyaprakash, A. & Hoy, M.A. 2000. Long PCR improves Wolbachia DNA amplification: wsp sequences found in 76% of sixty-three arthropod species. Insect Mol. Biol. 9: 393-405.
Jiang, W., Zhu, J., Chen, M., Yang, Q., Du, X., Chen, S., Zhang, L., Yu, Y. & Yu, W. 2014. Wolbachia infection status and genetic structure in natural populations of Polytremis nascens (Lepidoptera: Hesperiidae). Infect. Genet. Evol. 27: 202-211.
Jiang, W., Wu, Y., He, H., Zhu, J. & Yu, W. (2016) A prevalence survey of Wolbachia in Polytremis fukia (Lepidoptera: Hesperiidae). Journal of Asia-Pacific Entomology 19, 399–404
Jiggins, F.M., Hurst, G.D. & Majerus, M.E.N. 1998. Sex ratio distortion in Acraea encedon (Lepidoptera: Nymphalidae) is caused by a male-killing bacterium. Heredity 81: 87–91.
Jiggins, F. M., Hurst, G. D., Dolman, C. E. & Majerus, M. E. N. 2000a. High prevalence male-killing Wolbachia in the butterfly Acraea encedana. J. Evol. Biol. 13: 495-501.
Jiggins, F.M., Hurst, G.D., Jiggins, C.D., d Schulenburg, von, J.H. & Majerus, M.E.N. 2000b. The butterfly Danaus chrysippus is infected by a male-killing Spiroplasma bacterium. Parasitology 120: 439–446.
Jiggins, F.M., Bentley, J.K., Majerus, M.E. & Hurst, G.D. 2001. How many species are infected with Wolbachia? Cryptic sex ratio distorters revealed to be common by intensive sampling. Proc. R. Soc. Lond. B. Biol. Sci 268: 1123–1126.
Jiggins, F. M., Schulenburg, J. H. G. V. D., Hurst, G. D. D. & Majerus, M. E. N. (2001) Recombination confounds interpretations of Wolbachia evolution. Proceedings of the Royal Society B: Biological Sciences 268, 1423–1427
Kageyama, D., Nishimura, G., Hoshizaki, S. & Ishikawa, Y. 2002. Feminizing Wolbachia in an insect, Ostrinia furnacalis (Lepidoptera: Crambidae). Heredity. 88: 444-449.
Kageyama D, Nishimura G, Ohno S, Takanashi T, Hoshizaki S, Ishikawa Y. Wolbachia infection and an all-female trait in Ostrinia orientalis and Ostrinia zaguliaevi. Entomol Exp Appl. 2004;111(1):79–83. doi:10.1111/j.0013-8703.2004.00153.x.
Kageyama, D., Narita, S., Imamura, T. & Miyanoshita, A. (2010) Detection and identification of Wolbachia endosymbionts from laboratory stocks of stored-product insect pests and their parasitoids Journal of Stored Products Research 46, 13–19
Kittayapong, P., Jamnongluk, W., Thipaksorn, A., Milne, J.R. & Sindhusake, C. 2003. Wolbachia infection complexity among insects in the tropical rice-field community. Mol. Ecol. 12: 1049-1060.
Kodandaramaiah, U., Weingartner, E., Janz, N., Dalén, L. & Nylin, S. 2011. Population structure in relation to host-plant ecology and Wolbachia infestation in the comma butterfly. J. Evol. Biol. 24: 2173–2185.
Kodandaramaiah, U., Weingartner, E., Janz, N., Leski, M., Slove, J. Warren, A. & Nylin, S. 2012. PLoS One. 7: e41058.
Kvie, K.S., Hogner, S., Aarvik, L., Lifjeld, J.T. & Johnsen, A. 2013. Deep sympatric mtDNA divergence in the autumnal moth (Epirrita autumnata). Ecol. Evol. 3: 126-144.
Linares, M.C., Soto-Calderón, I.D., Lees, D.C & Anthony, N.M. 2009. High mitochondrial diversity in geographically widespread butterflies of Madagascar: a test of the DNA barcoding approach. Mol. Phylogenet. Evol. 50: 485-495.
Lohman, D.J., Peggie, D., Pierce, N.E. & Meier, R. 2008. Phylogeography and genetic diversity of a widespread Old World butterfly, Lampides boeticus (Lepidoptera: Lycaenidae). BMC Evol Biol 8: 301–301.
Longdon, B. et al. (2017) Vertically transmitted rhabdoviruses are found across three insect families and have dynamic interactions with their hosts. Proceedings of the Royal Society B: Biological Sciences 284, 20162381 (2017).
Łukasiewicz, K., Sanak, M. & Węgrzyn, G. (2016) A lack of Wolbachia-specific DNA in samples from apollo butterfly (Parnassius apollo, Lepidoptera: Papilionidae) individuals with deformed or reduced wings. J Appl Genetics 57, 271–274
McHugh A, Bierzychudek P, Greever C, Marzulla T, Van Buskirk R, Binford G.A molecular phylogenetic analysis of Speyeria and its implications for the management of the threatened Speyeria zerene hippolyta. J Insect Conserv.2013;17(6):1237–53. doi:10.1007/s10841-013-9605-5.
McLaughlin, R.E. & Myers, J. 1970. Ophryocystis elektroscirrha sp. n., a Neogregarine pathogen of the Monarch butterfly Danaus plexippus (L.) and the Florida Queen butterfly D. gilippus berenice Cramer. J. Protozool. 17: 300–305.
Morimoto, S., Nakai, M., Ono, A. & Kunimi, Y. 2001. Late male-killing phenomenon found in a Japanese population of the oriental tea tortrix, Homona magnanima (Lepidoptera: Tortricidae). Heredity 87: 435–440.
Munoz, A.G., Baxter, S.W., Linares, M. Jiggins, C.D. 2011. Deep mitochondrial divergence within a Heliconius butterfly species is not explained by cryptic speciation or endosymbiotic bacteria. BMC Evol. Biol. 11: 358.
Nakanishi, K., Hoshino, M., Nakai, M. & Kunimi, Y. (2008) Novel RNA sequences associated with late male killing in Homona magnanima. Proceedings of the Royal Society B: Biological Sciences 275, 1249–1254
Narita, S., ShimajiriY. & Nomura, M. 2009. Strong cytoplasmic incompatibility and high vertical transmission rate can explain the high frequencies of Wolbachia infection in Japanese populations of Colias erate poliographus (Lepidoptera: Pieridae). Bull. Entomol. Res. 99: 385-391.
NARITA, S., KAGEYAMA, D., HIROKI, M., SANPEI, T., HASHIMOTO, S., KAMITOH, T. and KATO, Y. (2011), Wolbachia-induced feminisation newly found in Eurema hecabe, a sibling species of Eurema mandarina (Lepidoptera: Pieridae). Ecological Entomology, 36: 309–317. doi:10.1111/j.1365-2311.2011.01274.x
Nice, C.C., Gompert, Z., Forister, M.L. & Fordyce, J.A. 2009. An unseen foe in arthropod conservation efforts: The case of Wolbachia infections in the Karner blue butterfly. Biol Conserv 142: 3137–3146.
Oduori, M.A., Lipa, J.J. & Gasparich, G.E. 2005. Spiroplasma leucomae sp. nov., isolated in Poland from the white satin moth (Leucoma salicis L.) larvae. Int. J. Syst. Evol. Microbiol. 57: 201-206.
Patricelli, D., Sielezniew, M., Ponikwicka-Tyszko, D., Ratkiewicz, M., Bonelli, S., Barbero, F., Witek, M., Buś, M., Rutkowski, R. & Balletto, E. 2013. Contrasting genetic structure of rear edge and continuous range populations of a parasitic butterfly infected by Wolbachia. BMC Evol. Biol. 13: 14.
Pattabhiramaiah, M., Reddy, M.S. & Brueckner, D. 2012. Presence of Wolbachia in the Lepidopteran insect pests of mulberry. Int. J. Eng. Res. Appl. 1: 16-22.
Pillay, P., Sweby, D.L., Martin, L.A., Zulu, M., Conlong, D.E., Rutherford, R.S. (2011) Effects of Wolbachia infection on the interactions between Eldana saccharina and its insect parasitoids. Proc. S. Afr. Sug. Technol. Ass. 84: 292-297 *non-refereed
Ritter, S., Michalski, S.G., Settele, J., Wiemers, M., Fric, Z.F., Sielezniew, M., Šašić, M., Rozier, Y. & Durka, W. 2013. Wolbachia Infections Mimic Cryptic Speciation in Two Parasitic Butterfly Species, Phengaris teleius and P. nausithous (Lepidoptera: Lycaenidae). PLoS One. 8: e78107.
Russell, J.A., Goldman-Huertas, B., Moreau, C.S., Baldo, L., Stahlhut, J.K., Werren, J.H., et al. 2009. Specialization and geographic isolation among Wolbachia symbionts from ants and lycaenid butterflies. Evolution 63: 624–640.
Russell, J.A., Funaro, C.F., Giraldo, Y.M., Goldman-Huertas, B., Suh, D., Kronauer, D.J.C., et al. 2012. A veritable menagerie of heritable bacteria from ants, butterflies, and beyond: broad molecular surveys and a systematic review. PLoS ONE 7: e51027.
Sakamoto, Y., Hirai, N., Tanikawa, T., Yago, M. & Ishii, M. 2011. Infection by two strains of Wolbachia and sex ratio distortion in a population of the endangered butterfly Zizina emelina (Lepidoptera: Lycaenidae) in northern Osaka prefecture, central Japan. Ann. Entom. Soc. Amer. 104: 483–487.
Salunke, B.K., Salunkhe, R.C., Dhotre, D.P., Walujkar, S.A., Khandagale, A.B., Chaudhari, R., et al. 2012. Determination of Wolbachia Diversity in Butterflies from Western Ghats, India, by a Multigene Approach. J. Appl. Environ. Microbiol. 78: 4458–4467.
Shokralla, S., Gibson, J.F., Nikbakht, H., Janzen, D.H., Hallwachs, W. & Hajibabaei, M. 2014. Next-generation DNA barcoding: using next-generation sequencing to enhance and accelerate DNA barcode capture from single specimens. Mol. Ecol. Resour. 14: 892-901.
SIELEZNIEW, M., RUTKOWSKI, R., PONIKWICKA-TYSZKO, D., RATKIEWICZ, M., DZIEKAŃSKA, I. and ŠVITRA, G. (2012), Differences in genetic variability between two ecotypes of the endangered myrmecophilous butterfly Phengaris (=Maculinea) alcon– the setting of conservation priorities. Insect Conservation and Diversity, 5: 223–236. doi:10.1111/j.1752-4598.2011.00163.x
Skaljac M, Kostanjsek R, Zanic K. The presence of Wolbachia in Tuta absoluta (Lepidoptera: Gelechiidae) populations from coastal Croatia and Montenegro. African Entomology. 2012;20(1):191–4.
Solovyev, V. I., Ilinsky, Y. & Kosterin, O. E. (2015) Genetic integrity of four species of Leptidea (Pieridae, Lepidoptera) as sampled in sympatry in West Siberia. CCG 9, 299–324
Tabata, J., Hattori, Y., Sakamoto, H., Yukuhiro, F., Fujii, T., Kugimiya, S., et al. 2011. Male killing and incomplete inheritance of a novel Spiroplasma in the moth Ostrinia zaguliaevi. Microb Ecol 61: 254–263.
Tagami, Y. & Miura, K. 2004. Distribution and prevalence of Wolbachia in Japanese populations of Lepidoptera. Insect Mol. Biol. 13: 359–364.
Tóth, J. P. et al. Mito-nuclear discordance helps to reveal the phylogeographic patterns of Melitaea ornata (Lepidoptera: Nymphalidae). Biological Journal of the Linnean Society 121, 267–281 (2017).
Ward, C. M. & Baxter, S. W. (2017) Draft Genome Assembly of a Wolbachia Endosymbiont of Plutella australiana. Genome Announcements 5, e01134–17
Weeks A.R., Velten, R. & Stouthamer, R. 2003. Incidence of a new sex-ratio-distorting endosymbiotic bacterium among arthropods. Proc. R. Soc. Lond. B. Biol. Sci. 270: 1857-1865.
Werren, J.H. & Windsor, D.M. 2000. Wolbachia infection frequencies in insects: evidence of a global equilibrium? Proc. R. Soc. Lond. B. Biol. Sci. 267: 1277–1285.
Werren, J.H., Windsor, D.M. & Guo, L. 1995. Distribution of Wolbachia among neotropical arthropods. Proc. R. Soc. Lond. B. Biol. Sci. 262: 197–204.
West, S.A., Cook, J.M., Werren, J.H. & Godfray, H.C.J. 1998. Wolbachia in two insect host-parasitoid communities. Mol. Ecol. 7: 1457-1465.
Weinert, L. A. (2009). The Evolution of Arthropod Rickettsia. PhD thesis, The University of Edinburgh, U.K.
Xu, P., Liu, Y., Graham, R. I., Wilson, K. & Wu, K. (2014) Densovirus Is a Mutualistic Symbiont of a Global Crop Pest (Helicoverpa armigera) and Protects against a Baculovirus and Bt Biopesticide. PLoS Pathog 10, e1004490
Yun, J-H., Roh, S.W., Whon, T.W., Jung, M-J., Kim, M-S., Park, D-S., Yoon, C., Nam, Y-D., Kim, Y-J., Choi, J-H., Kim, J-Y., Shin, N-R., Kim, S-H., Lee, W-J. & Bae, J-W. 2014 Insect gut bacterial diversity determined by environmental habitat, diet, developmental stage and phylogeny of host. Appl. Environ. Microbiol. 80: 5254-5264.
